# Supplementary material for: Pre-Treatment, Extraction Solvent, and Color Stability of Anthocyanins from Purple Sweetpotato
Source: MDPI journal article supplement (doi:10.3390/foods13060833), 2024-03-08
Supplement: s1 [file s1]

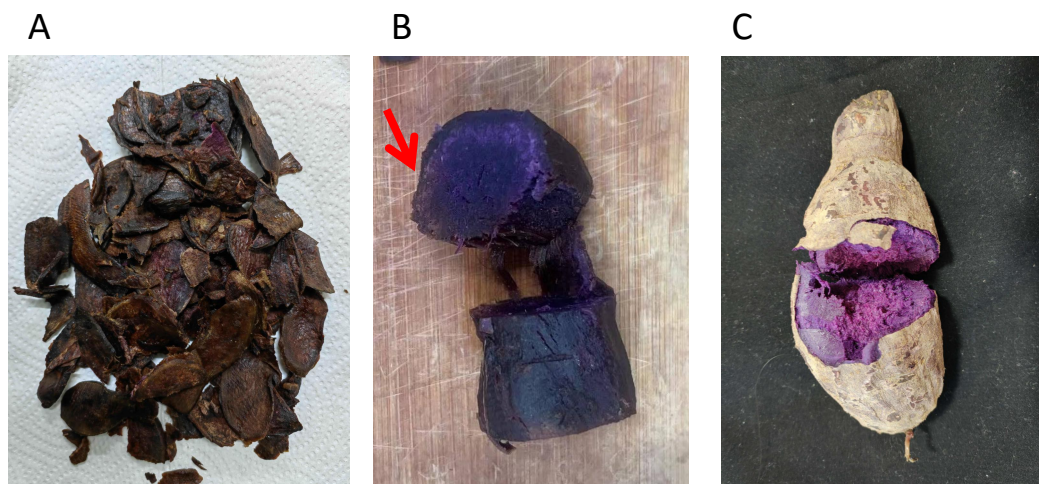

**Figure S1.** Appearance of the purple sweetpotato by different pre-treatments after steaming.

(A) peeled and sliced for SD-s, (B) peeled for SD-p, and (C) whole without peeling for SD-w. The red arrow showed the brown edge for the peeled sweetpotato sample.

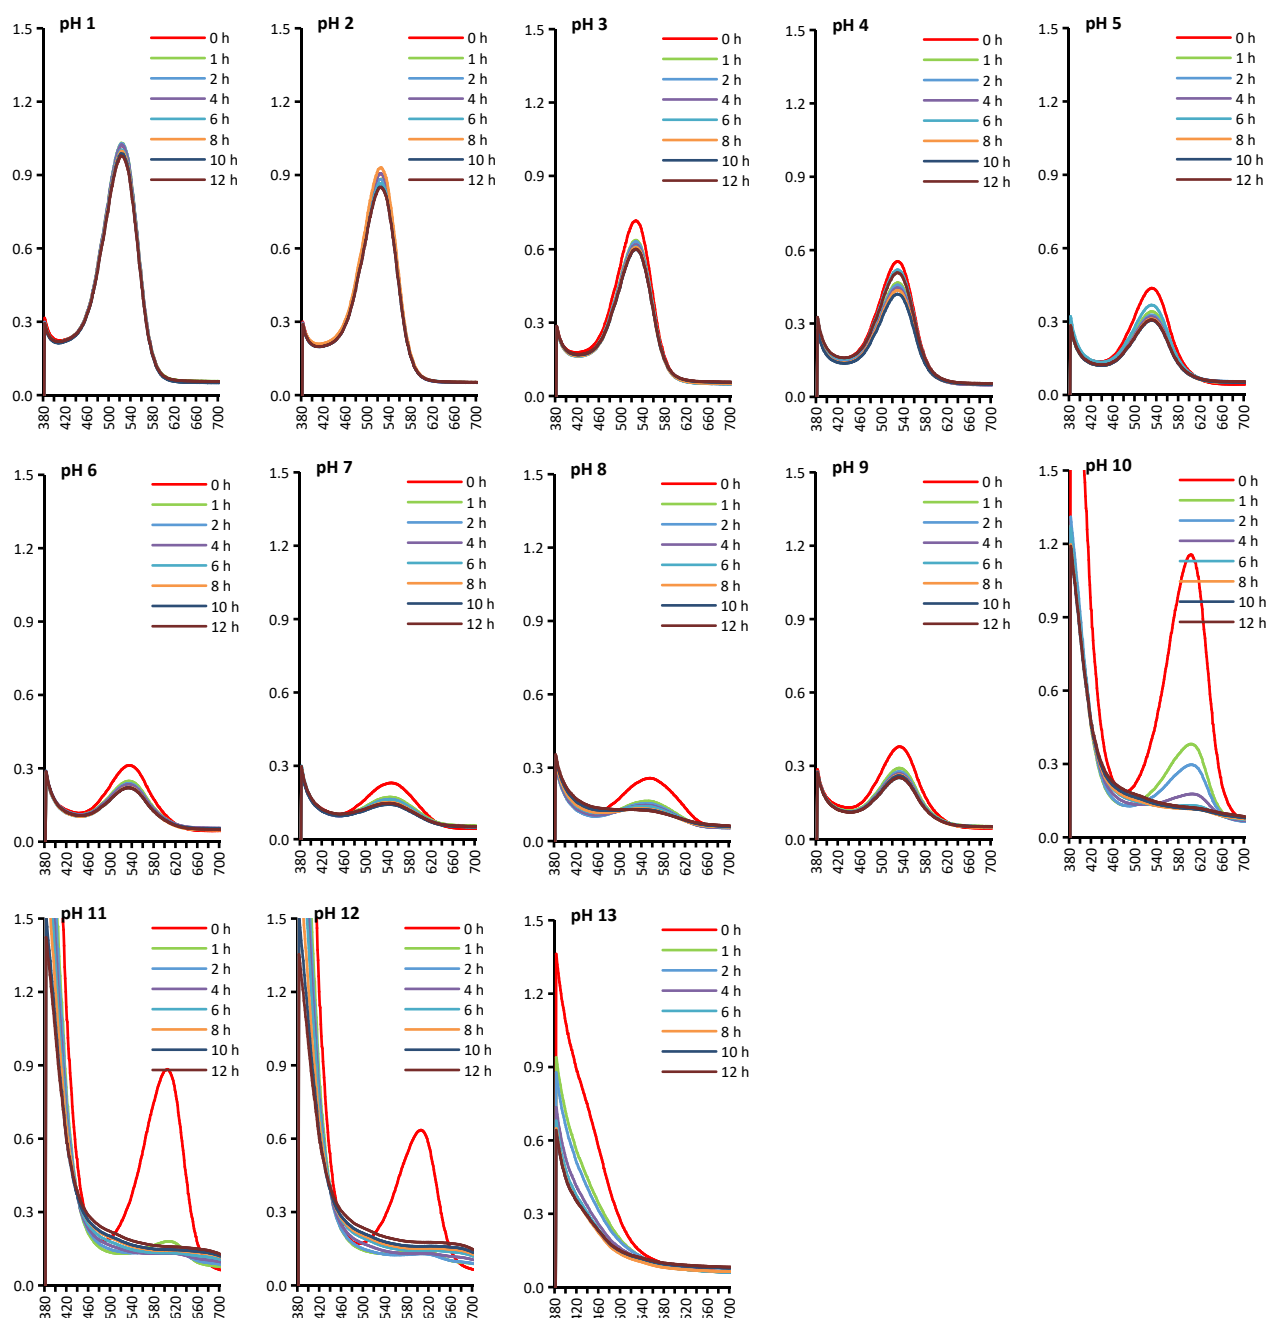

**Figure S2.** Spectra for PSPA degradation in solutions at different pHs at 65°C within 12 hours.

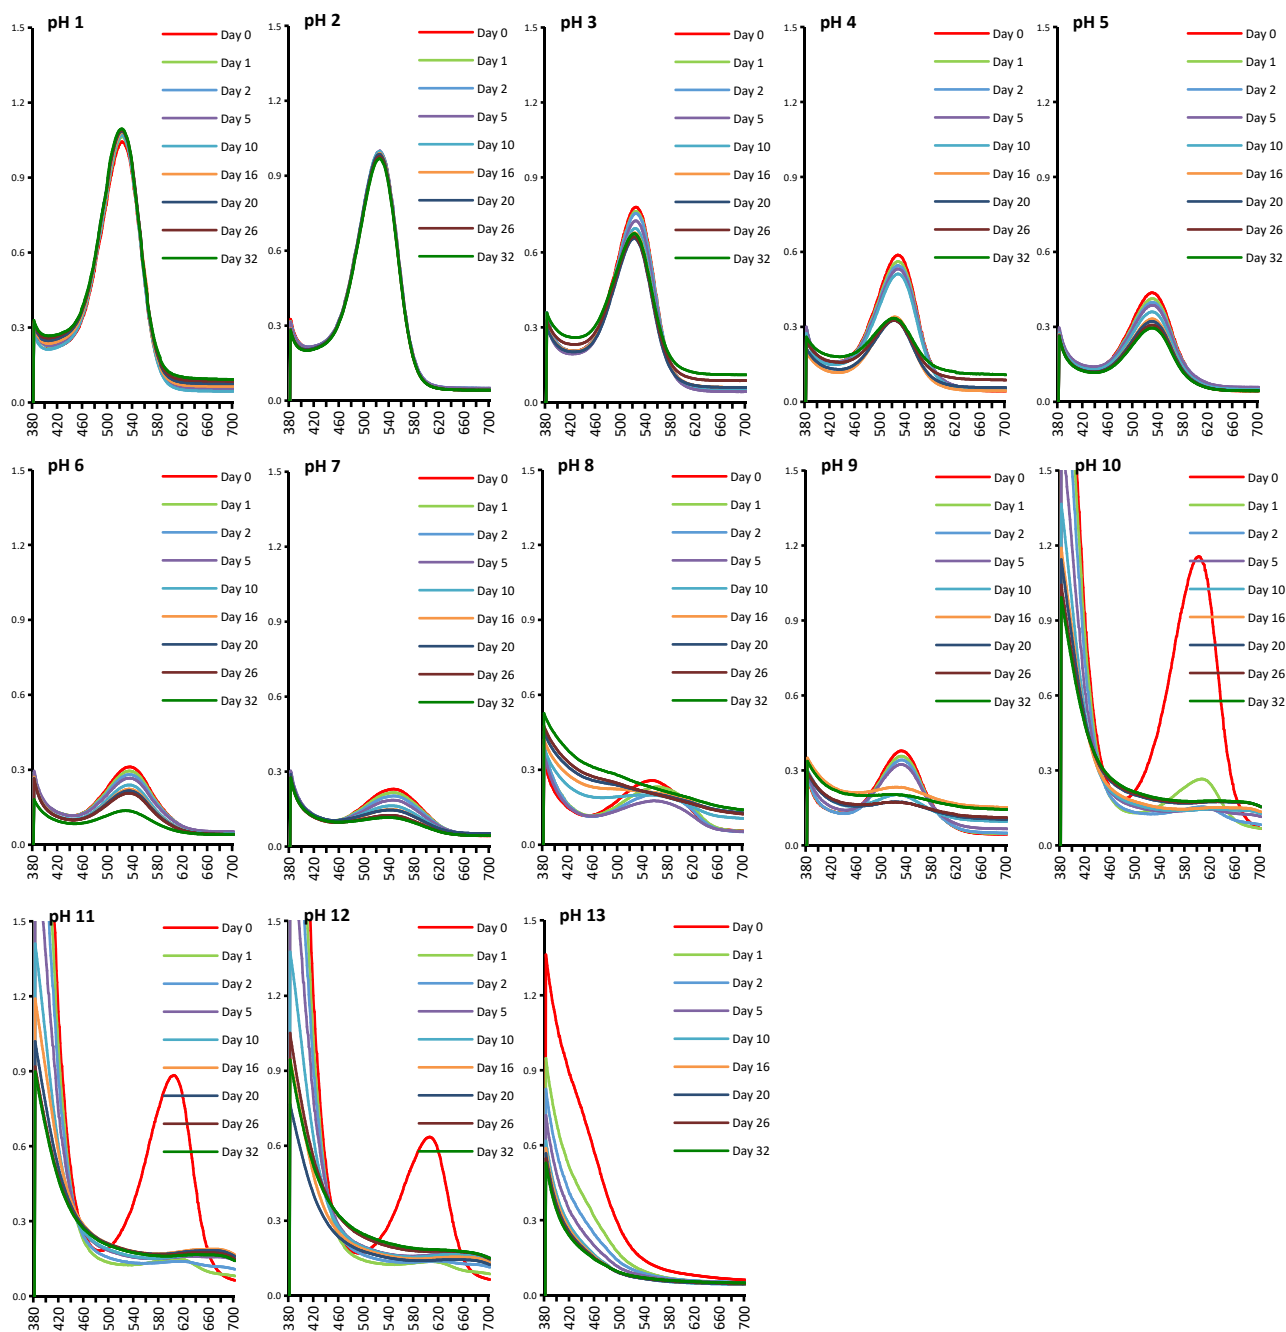

**Figure S3.** Spectra for PSPA degradation in solutions at different pHs at 25°C within 32 days.
